# Supplementary material for: Thermoresponsive Property of Poly(N,N-bis(2-methoxyethyl)acrylamide) and Its Copolymers with Water-Soluble Poly(N,N-disubstituted acrylamide) Prepared Using Hydrosilylation-Promoted Group Transfer Polymerization
Source: MDPI journal article supplement (doi:10.3390/polym15244681), 2023-12-12
Supplement: s1 [file s1]

## Supporting Information

### **Thermoresponsive Property of Poly(*N,N*-bis(2-methoxyethyl)acrylamide) Its Copolymers with Water-Soluble Poly(*N,N*-disubstituted acrylamide) Prepared Using Hydrosilylation-Promoted Group Transfer Polymerization**

Xiangming Fu,<sup>a</sup> Yanqiu Wang,<sup>a</sup> Liang Xu,<sup>a</sup> Atsushi Narumi,<sup>b</sup> Shin-ichiro Sato,<sup>c</sup>

Xiaoran Yang,<sup>a</sup> Xiande Shen,<sup>\*,a,d</sup> and Toyoji Kakuchi<sup>\*,a,c,d</sup>

<sup>a</sup> Research Center for Polymer Materials, School of Materials Science and Engineering, Changchun University of Science and Technology, Weixing Road 7989, Jilin 130022, China

<sup>b</sup> Graduate School of Organic Materials Science, Yamagata University, 4-3-16 Jonan, Yonezawa, Yamagata 992-8510, Japan

<sup>c</sup> Division of Applied Chemistry, Faculty of Engineering, Faculty of Engineering, Hokkaido University, Sapporo, Hokkaido 060-8628, Japan

<sup>d</sup> Chongqing Research Institute, Changchun University of Science and Technology, No. 618 Liangjiang Avenue, Longxing Town, Yubei District, Chongqing City 401135, China

#### CORRESPONDING AUTHOR FOOTNOTE

Tel & Fax: +81-11-706-6602. E-mail: kakuchi@eng.hokudai.ac.jp

## 1. Synthesis of MCIP-PMOEAm.

**Table S1.** Synthesis of MCIP-PMOEAm by GTP of MOEAm with SKA<sup>Et</sup> using B(C<sub>6</sub>F<sub>5</sub>)<sub>3</sub> as the catalyst. I would like to cancel above experiment.

| run | Polymer code               | [MOEAm] <sub>0</sub> /[SKA <sup>Et</sup> ] <sub>0</sub> /[B(C <sub>6</sub> F <sub>5</sub> ) <sub>3</sub> ] <sub>0</sub> | $M_{n, \text{calcd}}^b$<br>kg mol <sup>-1</sup> | $M_n (M_w/M_n)^c$<br>kg mol <sup>-1</sup> | $T_{cp}^d$ |
|-----|----------------------------|-------------------------------------------------------------------------------------------------------------------------|-------------------------------------------------|-------------------------------------------|------------|
| 1   | MCIP-PMOEAm <sub>25</sub>  | 25/1/0.1                                                                                                                | 4.9                                             | 5.1 (1.11)                                | 41.5       |
| 2   | MCIP-PMOEAm <sub>50</sub>  | 50/1/0.1                                                                                                                | 9.6                                             | 10.2 (1.13)                               | 40.8       |
| 3   | MCIP-PMOEAm <sub>75</sub>  | 75/1/0.1                                                                                                                | 14.2                                            | 14.4 (1.12)                               | 39.7       |
| 4   | MCIP-PMOEAm <sub>100</sub> | 100/1/0.1                                                                                                               | 18.9                                            | 18.6 (1.15)                               | 38.0       |
| 5   | MCIP-PMOEAm <sub>150</sub> | 150/1/0.2                                                                                                               | 28.3                                            | 27.9 (1.14)                               | 36.2       |
| 6   | MCIP-PMOEAm <sub>200</sub> | 200/1/0.2                                                                                                               | 37.6                                            | 38.8 (1.15)                               | 34.5       |

<sup>a</sup> [MOEAm]<sub>0</sub>, 1.0 mol L<sup>-1</sup>; solvent, CH<sub>2</sub>Cl<sub>2</sub>; temp., 25 °C; Ar atmosphere; monomer conversion determined by <sup>1</sup>H NMR in CDCl<sub>3</sub>, >99.9%, time, 8 h for runs 1–4 and 12 h for runs 5 and 6. <sup>b</sup> Calculated using the equation of [MOEAm]<sub>0</sub>/[SKA<sup>Et</sup>]<sub>0</sub> x (conv.) x (MW of MOEAm) + (MW of (CH<sub>3</sub>OCOC(CH<sub>3</sub>)<sub>2</sub> + H)). <sup>c</sup> Determined by SEC equipped with a RI detector in DMF containing lithium chloride (0.01 mol L<sup>-1</sup>) using PMMA standards. <sup>d</sup> Determined by UV-vis measurements in water (10 g L<sup>-1</sup>).

## 2. Synthesis of PEOEAm.

The hydrosilylation-promoted GTP of EOEAm with Me<sub>2</sub>EtSiH using B(C<sub>6</sub>F<sub>5</sub>)<sub>3</sub> as the catalyst synthesis of PEOEAm performed to prepare the PEOEAm<sub>x</sub> with  $M_{n,SEC}$  ( $M_w/M_n$ ) and  $T_{cp}$  as follows. x = 25, 5.4 kg mol<sup>-1</sup> (1.15) and 14.5 °C; x = 50, 10.5 kg mol<sup>-1</sup> (1.15) and 13.9 °C; x = 15.9 kg mol<sup>-1</sup> (1.12) and 8.9 °C; x = 100, 21.8 kg mol<sup>-1</sup> (1.11) and 8.0 °C; x = 150, 31.8 kg mol<sup>-1</sup> (1.10) and 5.9 °C; x = 200, 42.5 kg mol<sup>-1</sup> (1.10) and 5.0 °C.

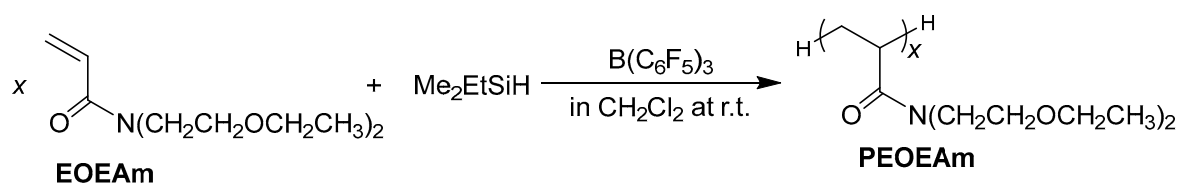

### 3. Monomer reactivity ratio

**Random GTcoP of MOEAm and DMAm.** The monomer reactivity ratios of  $r_{\text{MOEAm}}$  and  $r_{\text{DMAm}}$  were determined using the Kelen–Tüdös equation of  $\eta = (r_{\text{MOEAm}} + r_{\text{DMAm}}/\alpha)\xi - r_{\text{DMAm}}/\alpha$ , where  $\eta$  and  $\xi$  are mathematical functions of the comonomer molar fractions in the feed and in the copolymer, respectively:  $\eta = G/(\alpha + F)$  and  $\xi = F/(\alpha + F)$ . Here,  $G = x(y - 1)/y$  and  $F = x^2/y$  with  $x = M_{\text{MOEAm}}/M_{\text{DMAm}}$  and  $y = m_{\text{MOEAm}}/m_{\text{DMAm}}$ .  $F_{\text{MOEAm}}$  and  $F_{\text{DMAm}}$  are the mole fractions of MOEAm and DMAm in the monomer feed, respectively,  $M_{\text{MOEAm}}$  and  $M_{\text{DMAm}}$  are the mole fractions of MOEAm and DMAm in the residual monomer mixture, respectively, and  $m_{\text{MOEAm}}$  and  $m_{\text{DMAm}}$  are the mole fractions of MOEAm and DMAm units in the copolymer, respectively. The term  $\alpha = \sqrt{F_m F_M}$  is a constant that is chosen appropriately to obtain a uniform spread of the data ( $\alpha > 0$ ).  $F_m$  and  $F_M$  are the lowest and highest values obtained from the experimental data. The monomer reactivity ratios  $r_{\text{MOEAm}}$  and  $r_{\text{DMAm}}$  were determined to be 0.39 and 0.94, respectively, from the least-squares method. The number-average sequence length of the MOEAm unit ( $l_{\text{MOEAm}}$ ) was determined as a parameter that reflects the isolation tendency of the MOEAm–MOEAm diad. The  $l_{\text{MOEAm}}$  was calculated from the equation of  $l_{\text{MOEAm}} = 1 + r_{\text{MOEAm}}[F_{\text{MOEAm}}/(1 - F_{\text{MOEAm}})]$ . In addition, the  $l_{\text{DMAm}}$  was calculated from the equation of  $l_{\text{DMAm}} = 1 + r_{\text{DMAm}}[F_{\text{DMAm}}/(1 - F_{\text{DMAm}})]$ .

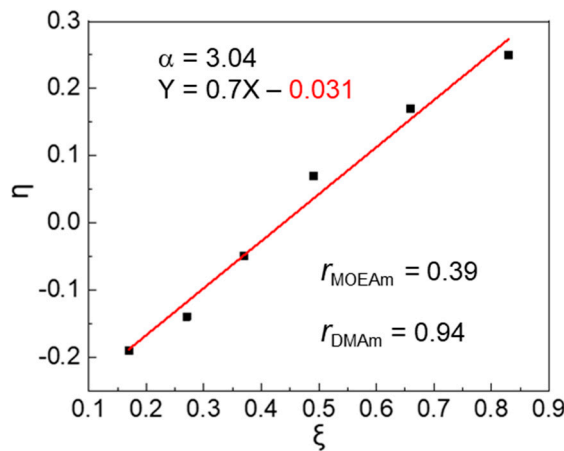

**Table S2.** Random group transfer copolymerization (GTcoP) of MOEAm and DMAm with Me<sub>2</sub>EtSiH using B(C<sub>6</sub>F<sub>5</sub>)<sub>3</sub> as the catalyst <sup>a</sup>

| $F_{\text{MOEAm}} + F_{\text{DMAm}} = 1$ |                   | $M_{\text{MOEAm}} + M_{\text{DMAm}} = 1$ <sup>b</sup> |                   | conv. % | $m_{\text{MOEAm}} + m_{\text{DMAm}} = 1$ <sup>b</sup> |                   | $\xi$ | $\eta$ | $l_{\text{MOEAm}}$ | $l_{\text{DMAm}}$ |
|------------------------------------------|-------------------|-------------------------------------------------------|-------------------|---------|-------------------------------------------------------|-------------------|-------|--------|--------------------|-------------------|
| $F_{\text{MOEAm}}$                       | $F_{\text{DMAm}}$ | $M_{\text{MOEAm}}$                                    | $M_{\text{DMAm}}$ |         | $m_{\text{MOEAm}}$                                    | $m_{\text{DMAm}}$ |       |        |                    |                   |
| 0.3                                      | 0.7               | 0.33                                                  | 0.67              | 0.17    | 0.28                                                  | 0.72              | 0.17  | -0.19  | 1.17               | 3.19              |
| 0.4                                      | 0.6               | 0.45                                                  | 0.55              | 0.18    | 0.37                                                  | 0.63              | 0.27  | -0.14  | 1.26               | 2.41              |
| 0.5                                      | 0.5               | 0.55                                                  | 0.45              | 0.19    | 0.46                                                  | 0.54              | 0.37  | -0.05  | 1.39               | 1.94              |
| 0.6                                      | 0.4               | 0.66                                                  | 0.34              | 0.20    | 0.56                                                  | 0.44              | 0.49  | 0.07   | 1.59               | 1.63              |
| 0.7                                      | 0.3               | 0.77                                                  | 0.23              | 0.21    | 0.65                                                  | 0.35              | 0.66  | 0.17   | 1.91               | 1.40              |
| 0.8                                      | 0.2               | 0.87                                                  | 0.13              | 0.18    | 0.75                                                  | 0.25              | 0.83  | 0.25   | 2.56               | 1.27              |

<sup>a</sup> [Me<sub>2</sub>EtSiH]<sub>0</sub>/[B(C<sub>6</sub>F<sub>5</sub>)<sub>3</sub>]<sub>0</sub> = 1/0.1; solvent, CH<sub>2</sub>Cl<sub>2</sub>; temperature, 25 °C. <sup>b</sup> Determined by <sup>1</sup>H NMR spectroscopy in CDCl<sub>3</sub>.

**Random GTcoP of MOEAm and EOEA<sub>m</sub>.** The monomer reactivity ratios of  $r_{\text{MOEAm}}$  and  $r_{\text{EOEA}_m}$  were 1.45 and 1.03, respectively, which were determined using the same method for determining  $r_{\text{MOEAm}}$  and  $r_{\text{DMA}_m}$ . In addition, the number-average sequence lengths of the MOEAm unit ( $l_{\text{MOEAm}}$ ) and EOEA<sub>m</sub> unit ( $l_{\text{EOEA}_m}$ ) were calculated using  $l_{\text{MOEAm}} = 1 + r_{\text{MOEAm}}[F_{\text{MOEAm}}/(1 - F_{\text{MOEAm}})]$  and  $l_{\text{DMA}_m} = 1 + r_{\text{DMA}_m}[F_{\text{DMA}_m}/(1 - F_{\text{DMA}_m})]$ , respectively.

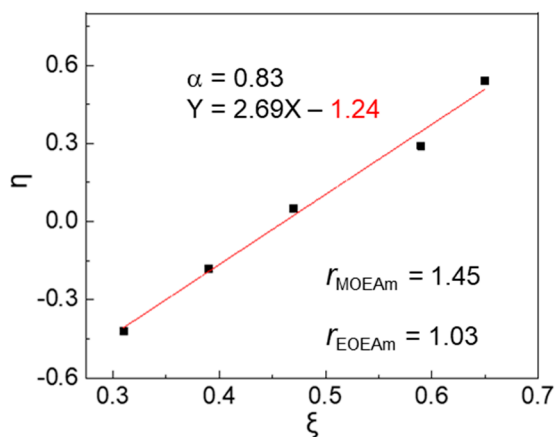

**Table S3.** Random group transfer copolymerization (GTcoP) of MOEAm and EOEA<sub>m</sub> with Me<sub>2</sub>EtSiH using B(C<sub>6</sub>F<sub>5</sub>)<sub>3</sub> as the catalyst <sup>a</sup>

| $F_{\text{MOEAm}} + F_{\text{EOEA}_m} = 1$ |                     | $M_{\text{MOEAm}} + M_{\text{EOEA}_m} = 1$ <sup>b</sup> |                     | conv. % | $m_{\text{MOEAm}} + m_{\text{EOEA}_m} = 1$ <sup>b</sup> |                     | $\xi$ | $\eta$ | $l_{\text{MOEAm}}$ | $l_{\text{EOEA}_m}$ |
|--------------------------------------------|---------------------|---------------------------------------------------------|---------------------|---------|---------------------------------------------------------|---------------------|-------|--------|--------------------|---------------------|
| $F_{\text{MOEAm}}$                         | $F_{\text{EOEA}_m}$ | $M_{\text{MOEAm}}$                                      | $M_{\text{EOEA}_m}$ |         | $m_{\text{MOEAm}}$                                      | $m_{\text{EOEA}_m}$ |       |        |                    |                     |
| 0.3                                        | 0.7                 | 0.29                                                    | 0.71                | 0.20    | 0.31                                                    | 0.69                | 0.31  | -0.42  | 1.62               | 3.40                |
| 0.4                                        | 0.6                 | 0.38                                                    | 0.62                | 0.21    | 0.42                                                    | 0.48                | 0.39  | -0.18  | 1.97               | 2.55                |
| 0.5                                        | 0.5                 | 0.47                                                    | 0.53                | 0.19    | 0.52                                                    | 0.52                | 0.47  | 0.05   | 2.45               | 2.03                |
| 0.6                                        | 0.4                 | 0.58                                                    | 0.42                | 0.20    | 0.62                                                    | 0.38                | 0.59  | 0.27   | 3.18               | 1.69                |
| 0.7                                        | 0.3                 | 0.67                                                    | 0.33                | 0.20    | 0.73                                                    | 0.73                | 0.65  | 0.54   | 4.38               | 1.44                |
| 0.8                                        | 0.2                 | 0.76                                                    | 0.24                | 0.22    | 0.84                                                    | 0.16                | 0.70  | 0.85   | 6.80               | 1.26                |

<sup>a</sup> [Me<sub>2</sub>EtSiH]<sub>0</sub>/[B(C<sub>6</sub>F<sub>5</sub>)<sub>3</sub>]<sub>0</sub> = 1/0.1; solvent, CH<sub>2</sub>Cl<sub>2</sub>; temperature, 25 °C. <sup>b</sup> Determined by <sup>1</sup>H NMR spectroscopy in CDCl<sub>3</sub>.

#### 4. SEC traces of PMOEAm and its block and statistical copolymers.

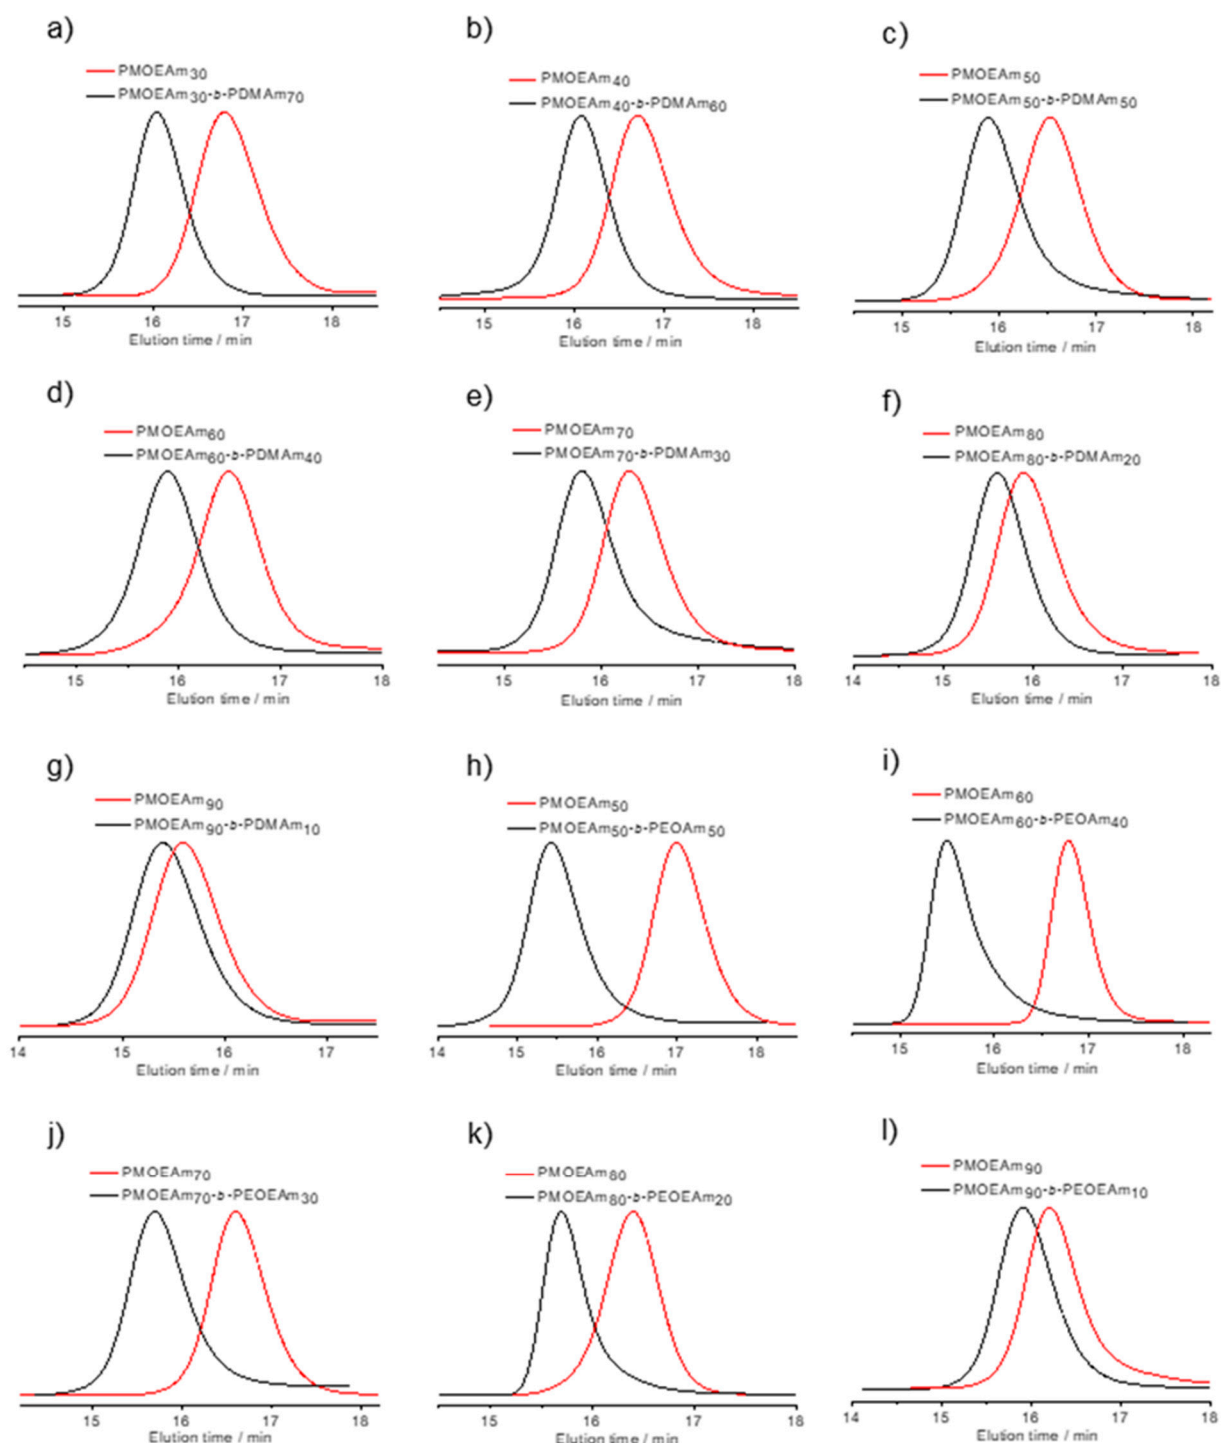

**Figure S1.** SEC traces of PMOEAm<sub>x</sub>-*b*-PDMAm<sub>y</sub> with a)  $x/y = 30/70$ , b)  $x/y = 40/60$ , c)  $x/y = 50/50$ , d)  $x/y = 60/40$ , e)  $x/y = 70/30$ , f)  $x/y = 80/20$ , and g)  $x/y = 90/10$  and PMOEAm<sub>x</sub>-*b*-PEOAm<sub>y</sub> with h)  $x/y = 50/50$ , i)  $x/y = 60/40$ , j)  $x/y = 70/30$ , k)  $x/y = 80/20$ , and l)  $x/y = 90/10$  (eluent, DMF containing lithium chloride ( $0.01 \text{ mol L}^{-1}$ ); flow rate,  $1.0 \text{ mL min}^{-1}$ ).



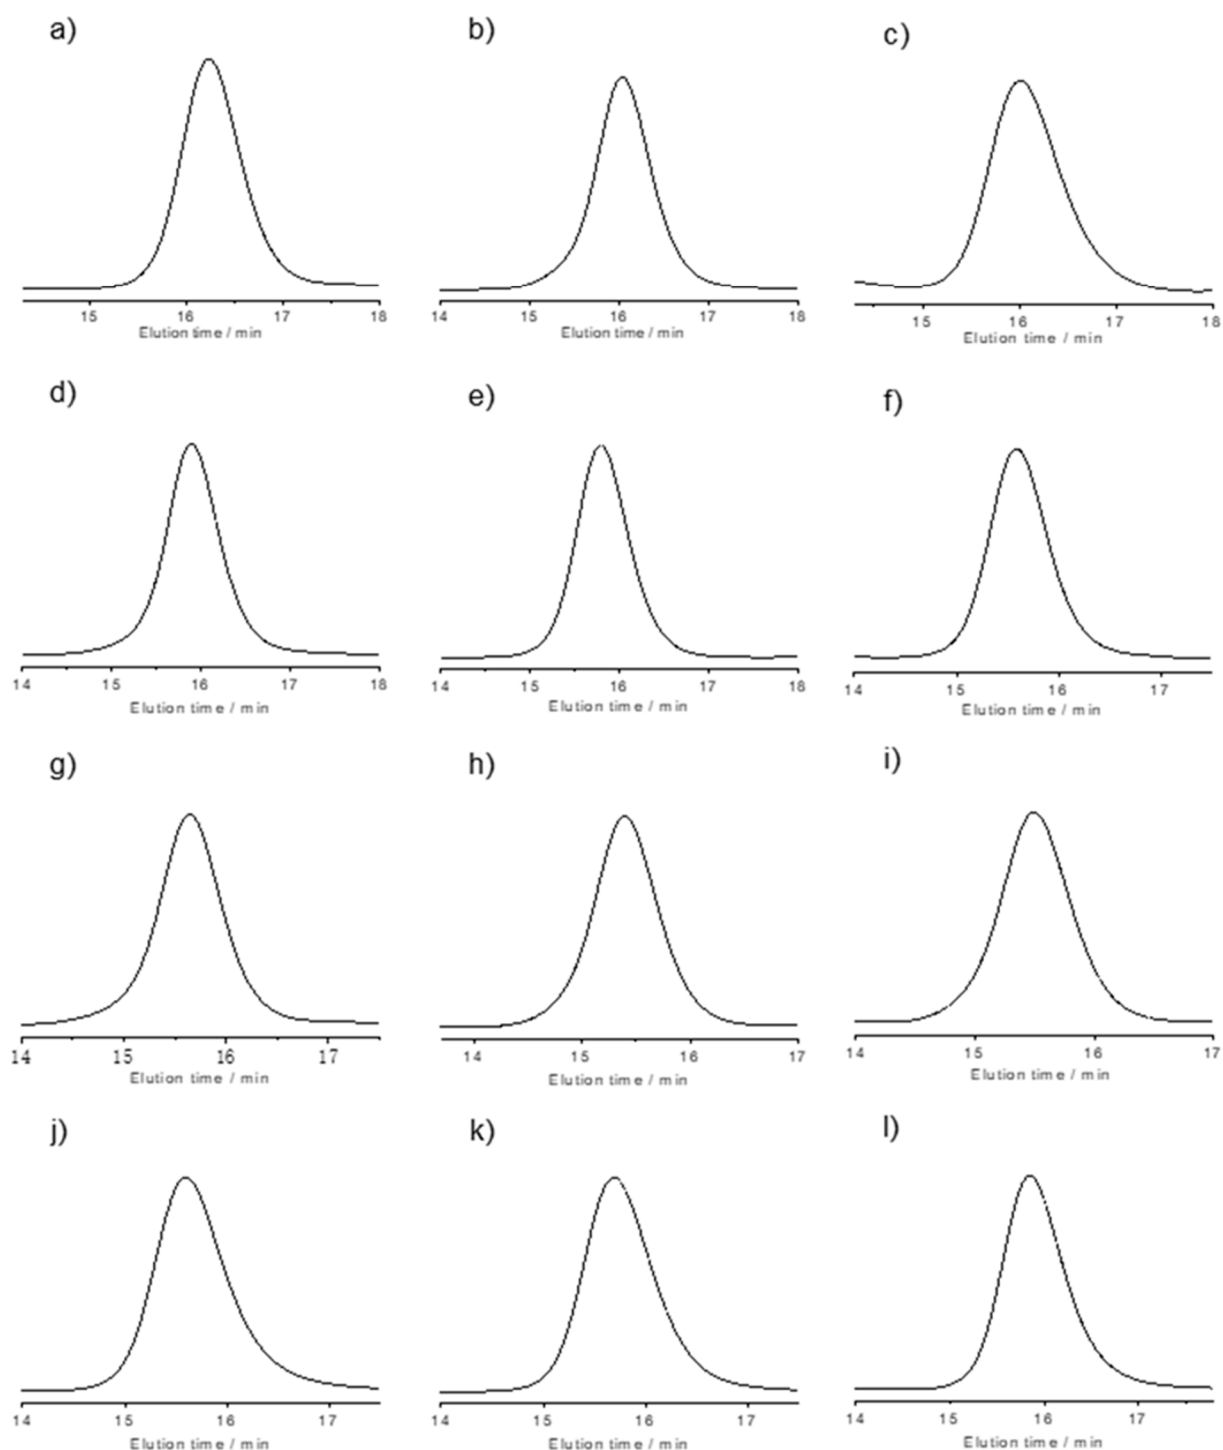

**Figure S2.** SEC traces of PMOEAm<sub>x</sub>-s-PDMAm<sub>y</sub> with a)  $x/y = 30/70$ , b)  $x/y = 40/60$ , c)  $x/y = 50/50$ , d)  $x/y = 60/40$ , e)  $x/y = 70/30$ , f)  $x/y = 80/20$ , and g)  $x/y = 90/10$  and PMOEAm<sub>x</sub>-s-PEOEAm<sub>y</sub> with h)  $x/y = 50/50$ , i)  $x/y = 60/40$ , j)  $x/y = 70/30$ , k)  $x/y = 80/20$ , and l)  $x/y = 90/10$  (eluent, DMF containing lithium chloride (0.01 mol L<sup>-1</sup>); flow rate, 1.0 mL min<sup>-1</sup>).

## 5. $^1\text{H}$ NMR spectra of block copolymers

a)

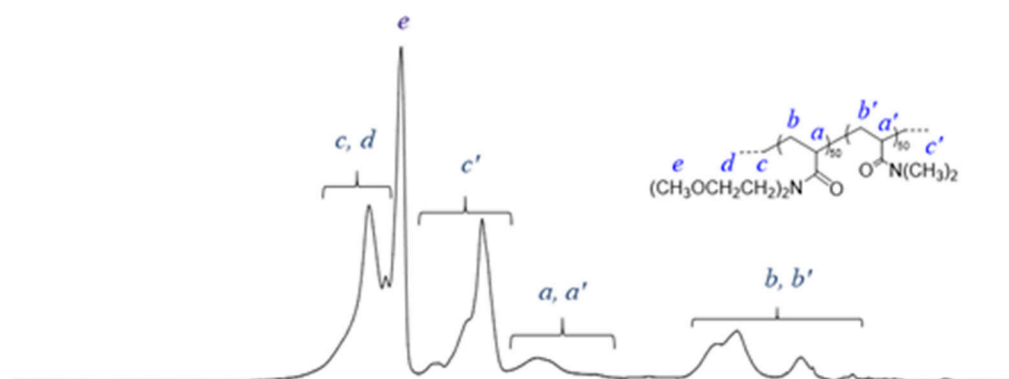

b)

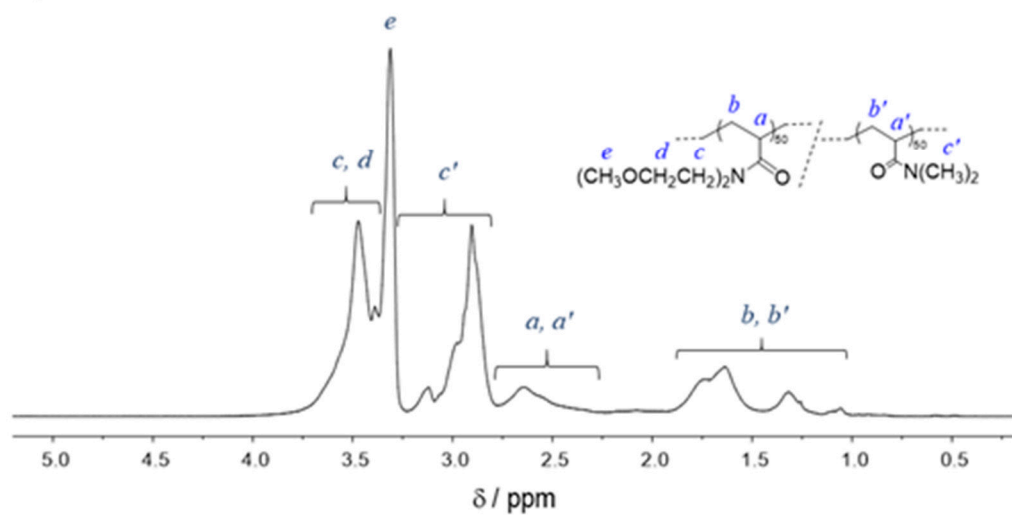

**Figure S3.**  $^1\text{H}$  NMR spectra of a) PMOEAm<sub>50</sub>-b-PDMAm<sub>50</sub> and b) PMOEAm<sub>50</sub>-s-PDMAm<sub>50</sub> in  $\text{CDCl}_3$ .

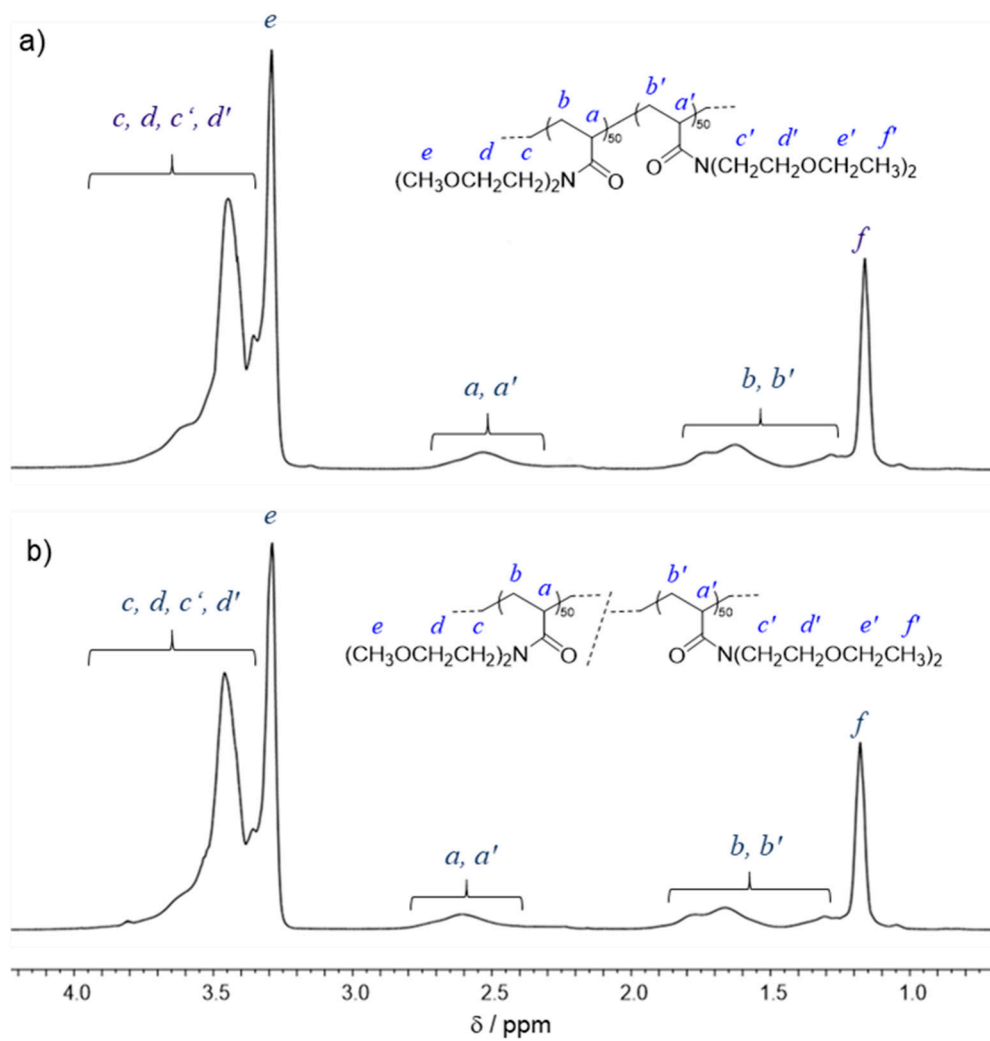

**Figure S4.**  $^1\text{H}$  NMR spectra of a) PMOEAm<sub>50</sub>-b-PEOEAm<sub>50</sub> and b) PMOEAm<sub>50</sub>-s-PEOEAm<sub>50</sub> in  $\text{CDCl}_3$ .

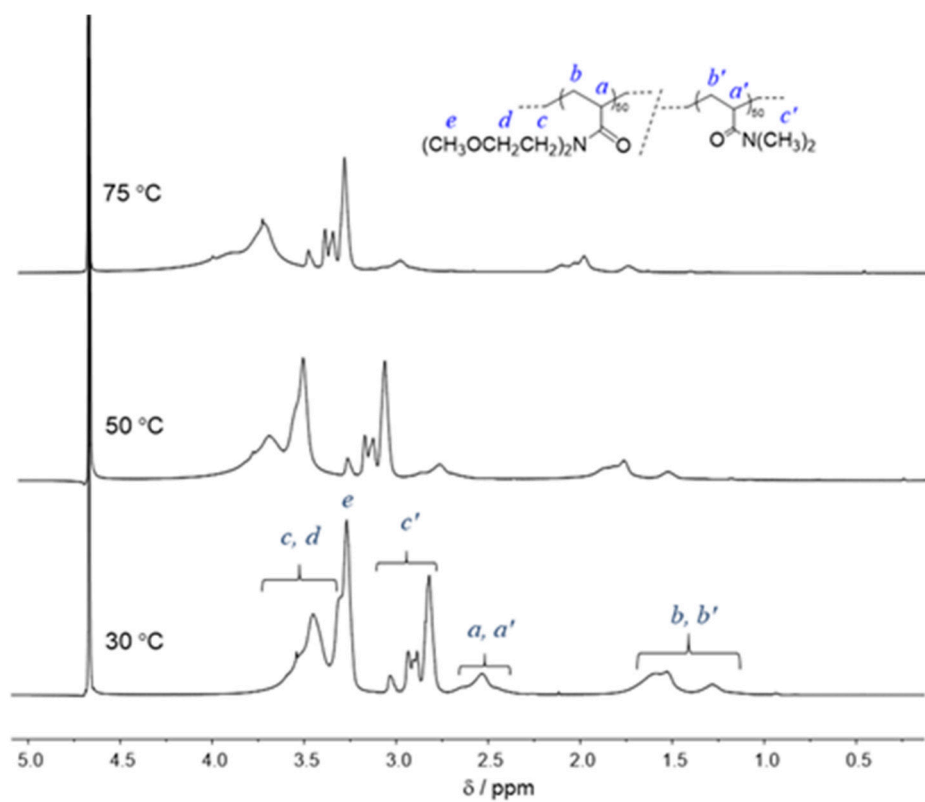

**Figure S5.**  $^1\text{H}$  NMR spectra of PMOEAm<sub>50</sub>-s-PDMAm<sub>50</sub> measured at 20, 30, and 50 °C in  $\text{D}_2\text{O}$ .

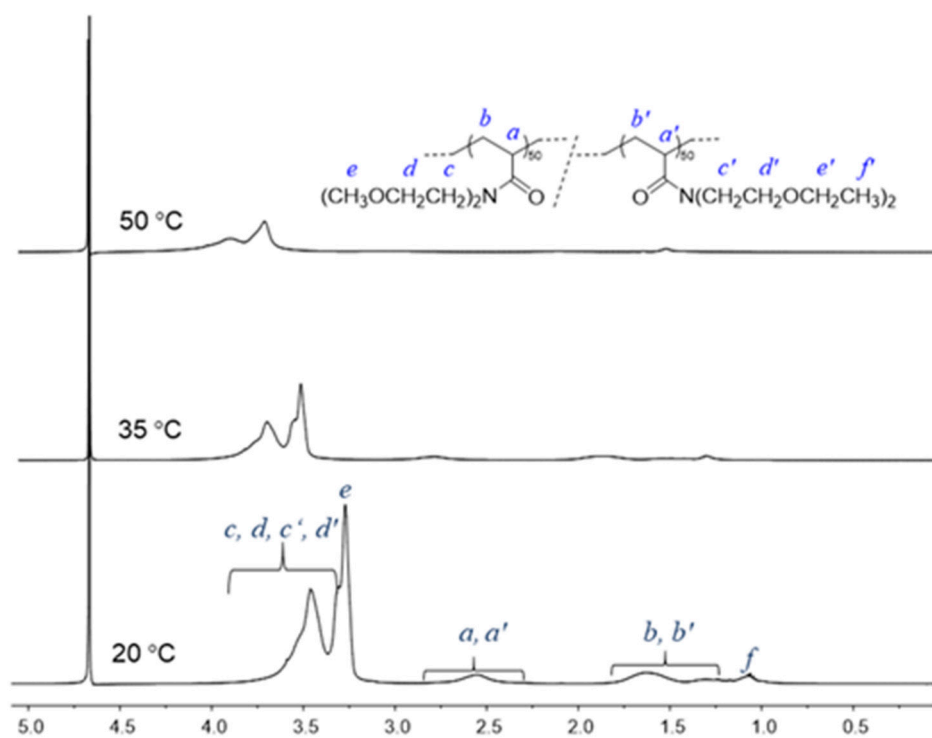

**Figure S6.** <sup>1</sup>H NMR spectra of PMOEAm<sub>50</sub>-s-PEOEAm<sub>50</sub> measured at 20, 35, and 50 °C in D<sub>2</sub>O.

## 6. Determination of cloud-point temperature ( $T_{cp}$ ) by UV-vis spectrophotometry

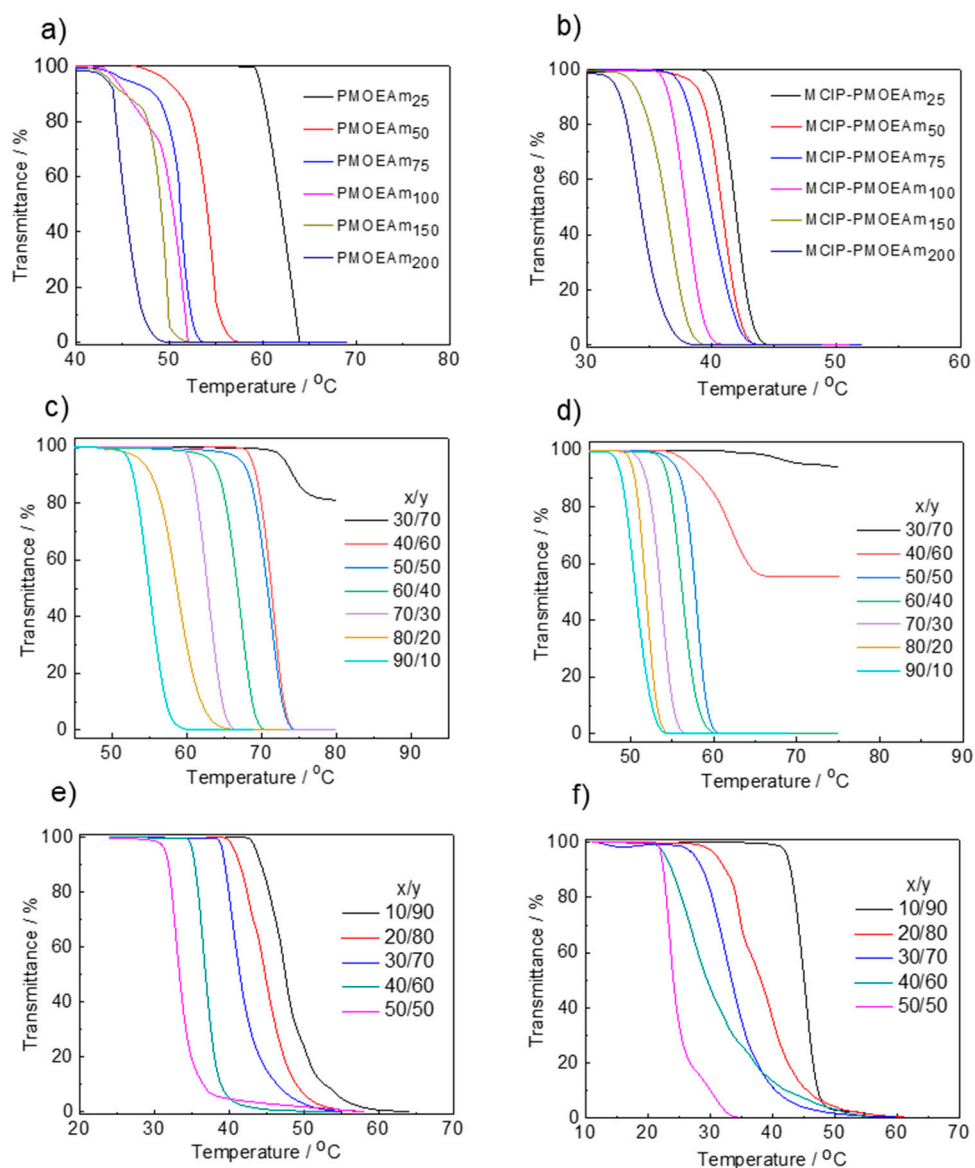

**Figure S7.** UV-vis absorption spectra of a) PMOEAm, b) MCIP-PMOEAm, c) PMOEAm-s-PDMAm, d) PMOEAm-b-PDMAm, e) PMOEAm-s-PEOEAm and f) PMOEAm-b-PEOEAm in water (10 g L<sup>-1</sup>) at different temperatures.

## 7. Dynamic light scattering (DLS) measurement of PMOEAm and its copolymers

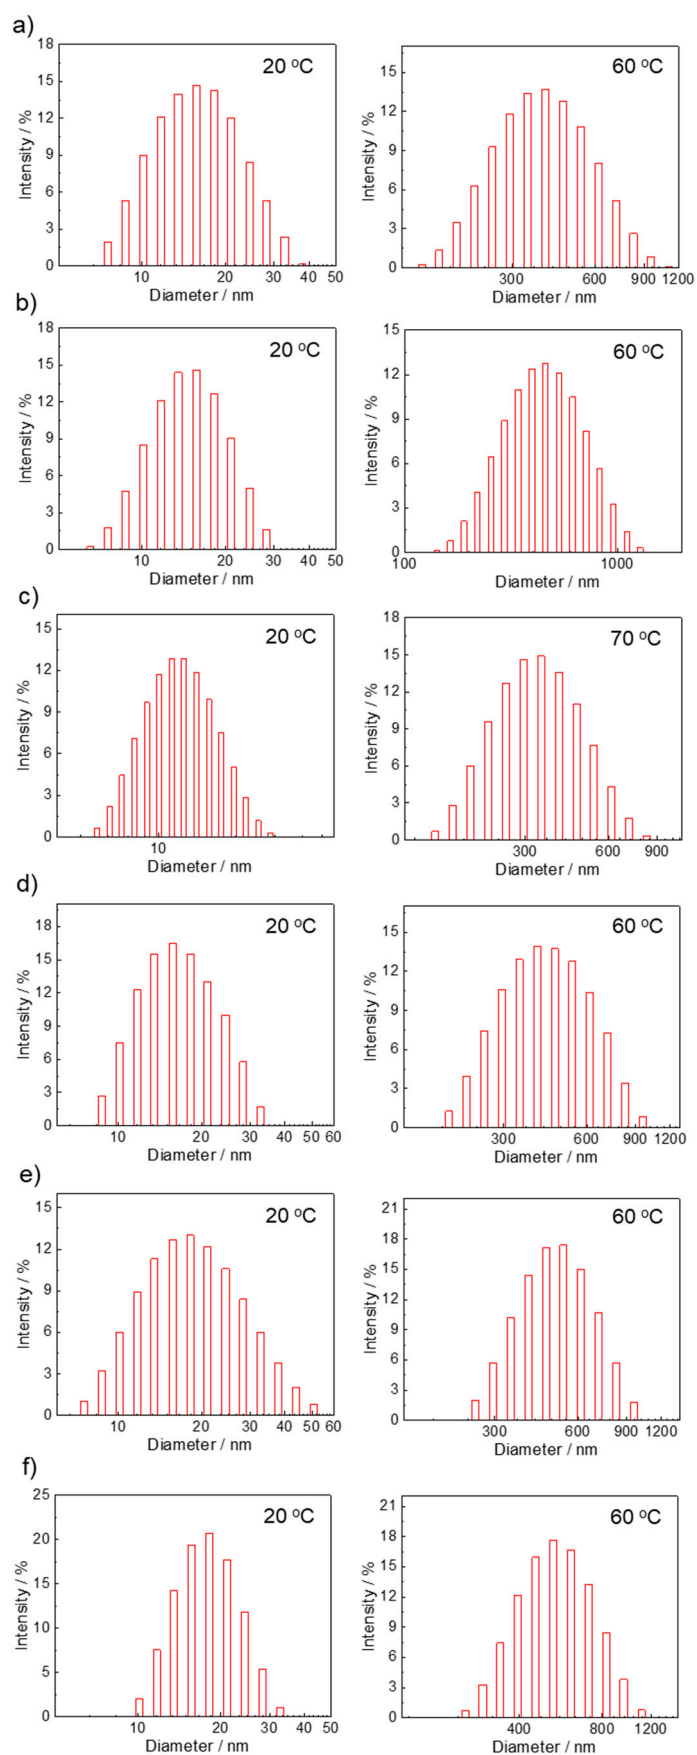

**Figure S8.**  $R_h$  values for a) PMOEAm<sub>50</sub>, b) MCIP-PMOEAm<sub>50</sub>, c) PMOEAm<sub>50</sub>-*s*-PDMAm<sub>50</sub>, d) PMOEAm<sub>50</sub>-*b*-PDMAm<sub>50</sub>, e) PMOEAm<sub>50</sub>-*s*-PEOEAm<sub>50</sub>, and f) PMOEAm<sub>50</sub>-*b*-PEOEAm<sub>50</sub> at 20 and 60 °C.
